# Supplementary material
Source: PubMed Central journal article supplement (PMC5419473)
Supplement: 251file007.pdf [file 251file007.pdf]

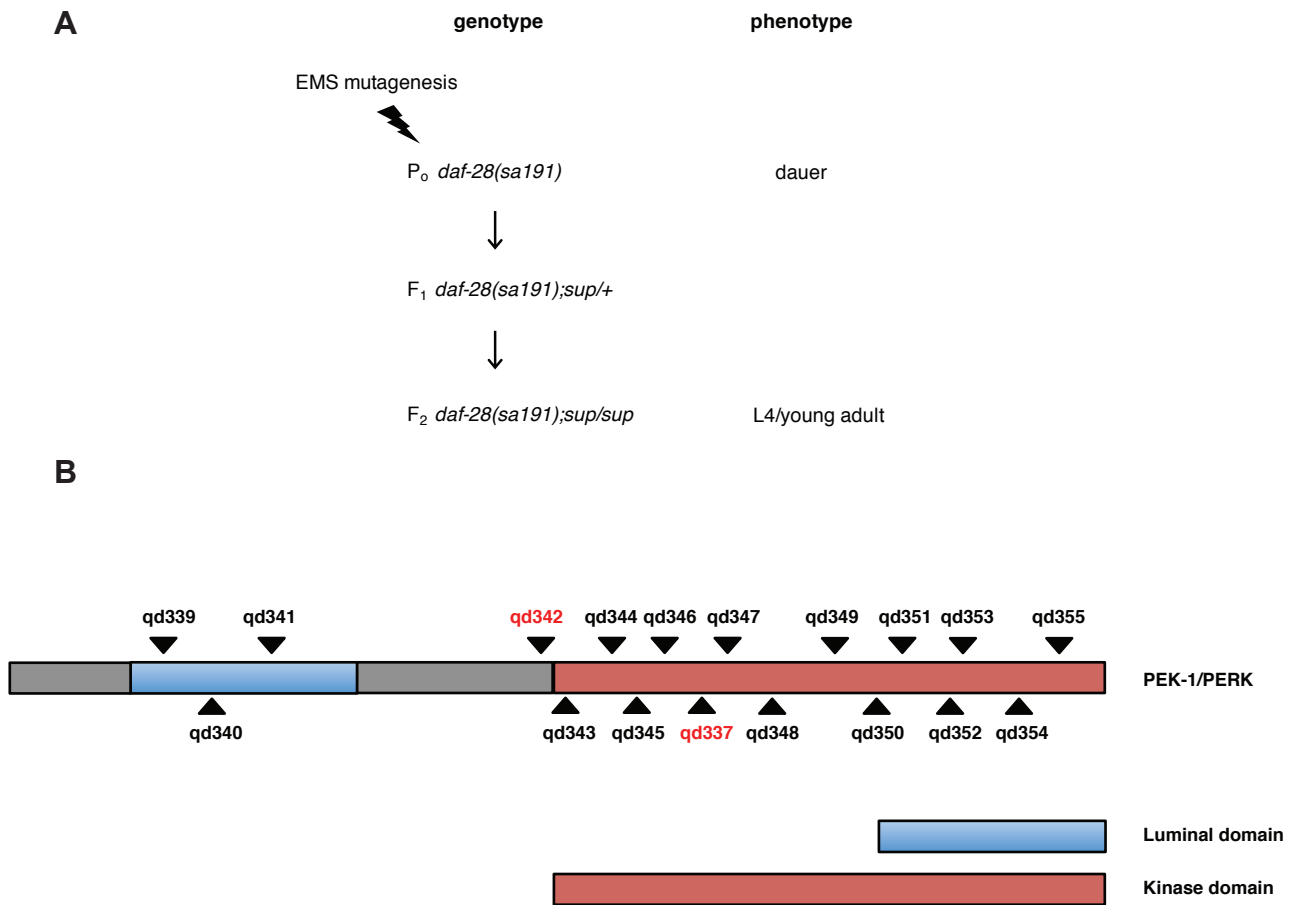

**Figure S1: Isolation of mutations that suppress the *daf-28(sa191)* constitutive dauer entry phenotype**  
 A. Schematic detailing the forward genetic approach used to isolate the F<sub>2</sub> mutants that failed to enter dauer diapause constitutively under laboratory conditions.  
 B. Schematic is based on conserved domains. X (table) and red font (schematic) represent stop codon and nonsense mutation respectively.

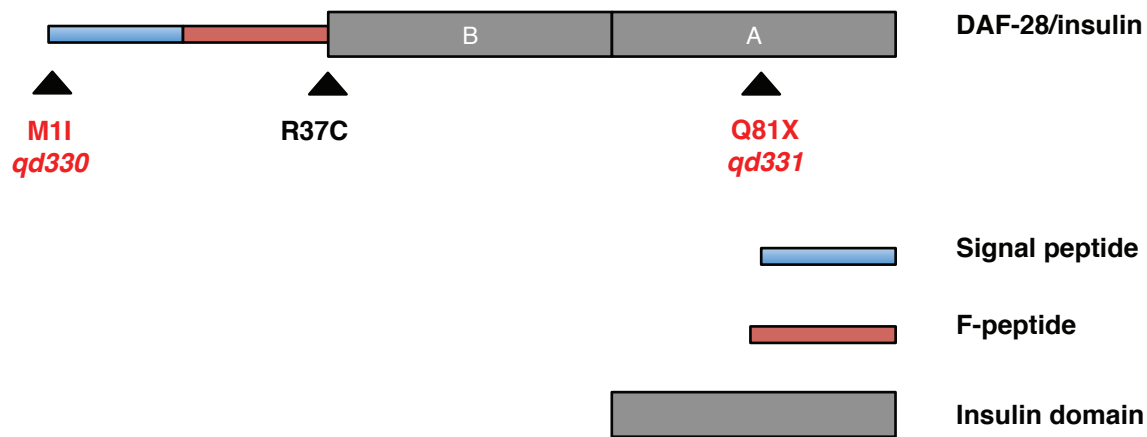

| Genotype                                   | Phenotype |
|--------------------------------------------|-----------|
| <i>daf-28(R37C)/daf-28(R37C)</i>           | dauer     |
| <i>daf-28(M11 R37C)/daf-28(M11 R37C)</i>   | L4        |
| <i>daf-28(M11 R37C)/daf-28(R37C)</i>       | dauer     |
| <i>daf-28(-)/daf-28(R37C)</i>              | dauer     |
| <i>daf-28(R37C Q81X)/daf-28(R37C Q81X)</i> | L4        |
| <i>daf-28(R37C Q81X)/daf-28(R37C)</i>      | L4        |
| <i>daf-28(+)/daf-28(R37C)</i>              | L4        |

### Figure S2: Second-site mutations in *daf-28* suppress the dauer entry phenotype

We identified a second-site mutation in the start codon (M11) that resulted in intragenic suppression of the constitutive dauer entry phenotype. Consistent with its loss-of-function alteration, the *daf-28(M11 R37C)* allele behaved similarly to the *daf-28* null allele, specifically in heteroallelic combination with *daf-28(R37C)*. We also isolated a second-site nonsense mutation (Q81X) that behaved similarly to the *daf-28* wild-type allele in heteroallelic combination with *daf-28(R37C)*, suggesting revertant alteration. The “dauer” phenotype refers to frequency of dauer formation higher than 90%. The “L4” phenotype refers to frequency of dauer formation lower than 10%. The phenotypes were based on at least three trials, with at least 100 animals per genotype. Data for *daf-28(-)/daf-28(R37C)* and *daf-28(+)/daf-28(R37C)* were presented in Kulalert and Kim, 2013. Schematic above the table represents protein domains of DAF-28 and was adapted from Li et al., 2003.

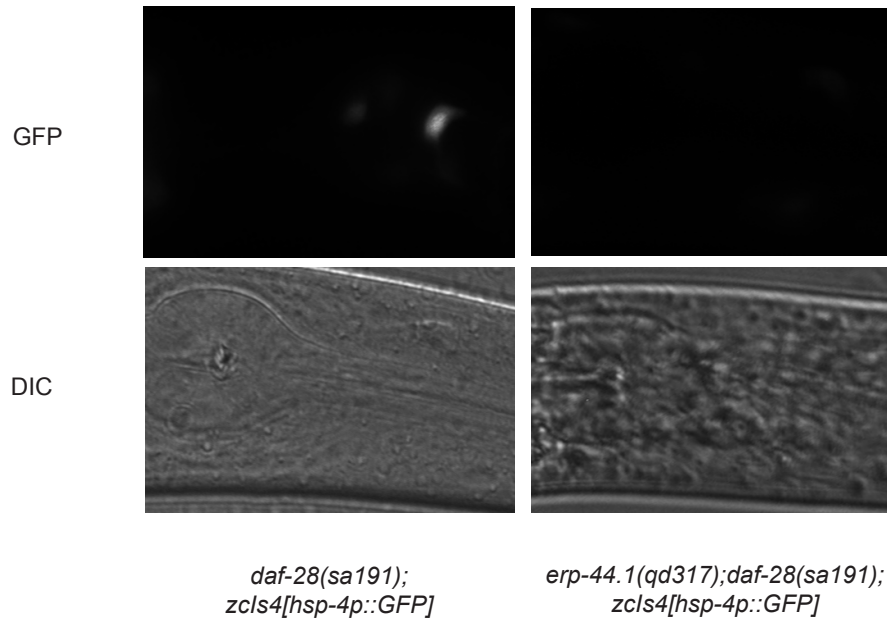

**Figure S3: Loss-of-function mutation in *erp-44.1* suppresses induction of the neuronal UPR in the *daf-28(sa191)* background**

Images of the animals with indicated genotypes, representative of multiple animals from two independent experiments. *GFP* expression is driven under the *hsp-4* promoter in the *zcls4* transgene, as utilized in our previous study (Kulalert and Kim, 2013). The *GFP* induction depicted above in the *daf-28(sa191);zcls4* background is consistent with the ASI-specific UPR activation described in Kulalert and Kim, 2013.

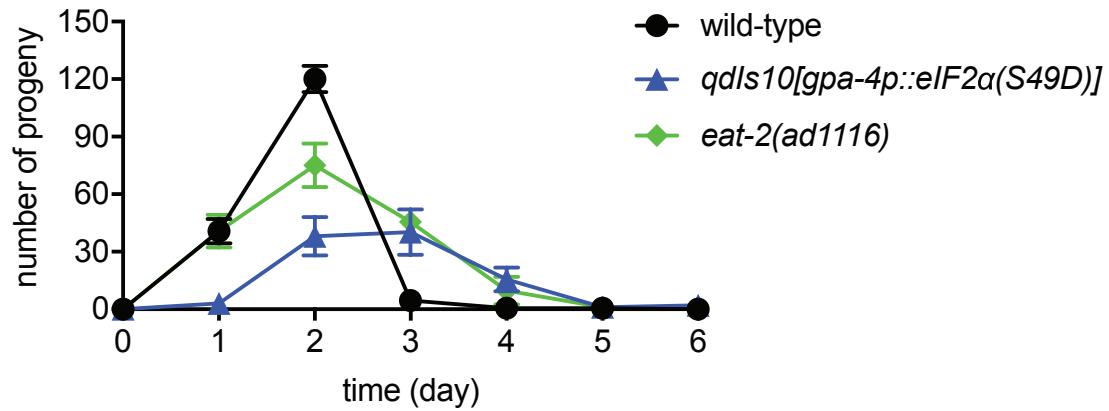

**Figure S4: Extension of the egg-laying period in the food uptake-defective *eat-2* mutant, similar to that observed in the *qdIs10* background**

The *ad1116* allele results in a splice site mutation in the *eat-2* gene, resulting in lifespan extension due to nutritional limitation. We note that while the egg-laying period was extended in the *eat-2* mutant, similar to the pattern exhibited by the animal carrying the *qdIs10* transgene, the total number of progeny was not significantly distinct from that of wild-type control. We observed reduced growth rate as well as clear appearances in the *eat-2* mutant, reminiscent of the animals carrying *qdIs10*.

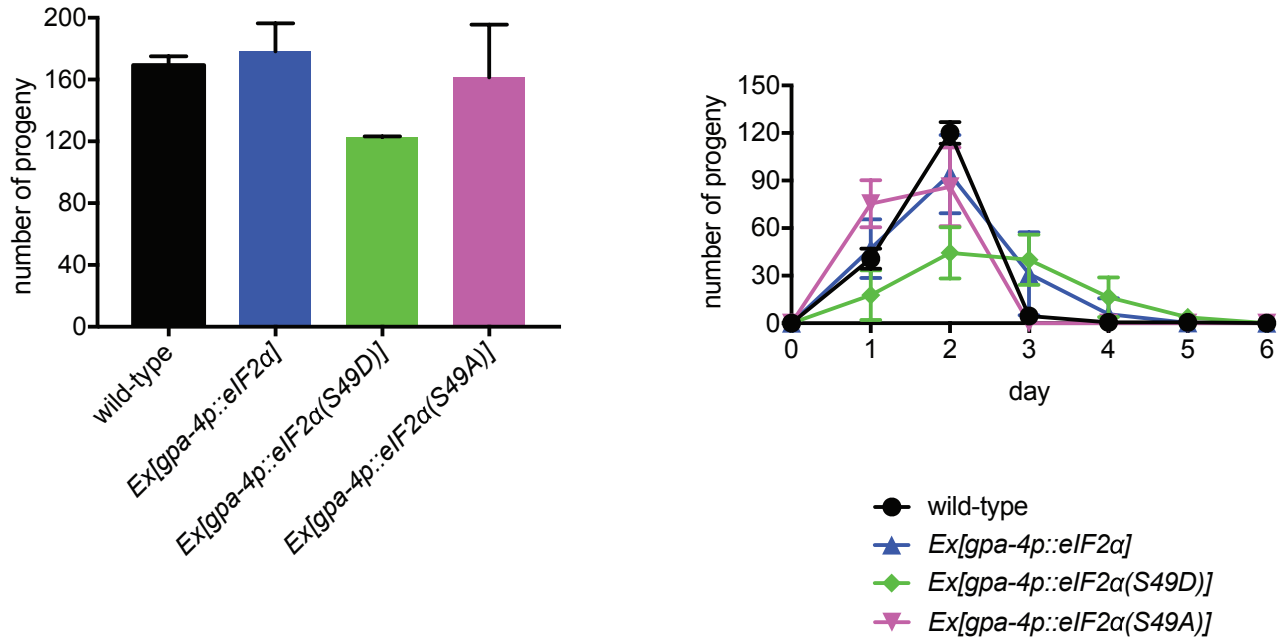

**Figure S5: The starvation-like reproductive response is specific to the phosphorylation state of neuronal eIF2 $\alpha$**

Animals harboring extrachromosomal arrays that express ASI-specific eIF2 $\alpha$  of indicated phosphorylation status of Ser49 were assayed for total number of brood size and egg-laying duration. The animals carrying the extrachromosomal phosphomimetic neuronal eIF2 $\alpha$  array appeared clear and small, and had reduced brood size, similar to the phenotypes conferred by the *qdl10* transgene. We note that while the animals expressing the wild-type eIF2 $\alpha$  appeared healthy, very few of them had somewhat clear and slightly smaller appearances, with normal progeny production. Importantly, the animals carrying the extrachromosomal unphosphorylatable neuronal eIF2 $\alpha$  transgene exhibited wild-type developmental and reproductive phenotypes.

| Gene            | Allele            | Molecular identity                     |
|-----------------|-------------------|----------------------------------------|
| <i>daf-28</i>   | <i>sa191qd330</i> | M1I R37C                               |
|                 | <i>sa191qd331</i> | R37C Q81X                              |
| <i>erp-44.1</i> | <i>qd329</i>      | W4X                                    |
|                 | <i>qd317</i>      | splice site (G to A),<br>3' to exon 2  |
|                 | <i>qd332</i>      | Q213X                                  |
| <i>pek-1</i>    | <i>qd339</i>      | G63E                                   |
|                 | <i>qd340</i>      | G147E                                  |
|                 | <i>qd341</i>      | P236L                                  |
|                 | <i>qd342</i>      | R519X                                  |
|                 | <i>qd343</i>      | G613D                                  |
|                 | <i>qd344</i>      | G616D                                  |
|                 | <i>qd345</i>      | D626N                                  |
|                 | <i>qd346</i>      | A631T                                  |
|                 | <i>qd337</i>      | R649X                                  |
|                 | <i>qd347</i>      | L654F                                  |
|                 | <i>qd348</i>      | E670K                                  |
|                 | <i>qd349</i>      | G875D                                  |
|                 | <i>qd350</i>      | G937R                                  |
|                 | <i>qd351</i>      | D956N                                  |
|                 | <i>qd352</i>      | G986S                                  |
|                 | <i>qd353</i>      | P993S                                  |
|                 | <i>qd354</i>      | G1037E                                 |
|                 | <i>qd355</i>      | splice site (G to A),<br>5' to exon 12 |
| <i>EIF-2A</i>   | <i>qd338</i>      | S49F                                   |
| <i>EIF-2Bα</i>  | <i>qd333</i>      | E28K                                   |
|                 | <i>qd334</i>      | T41I                                   |
|                 | <i>qd356</i>      | A70V                                   |
|                 | <i>qd357</i>      | R98C                                   |
|                 | <i>qd358</i>      | H132Y                                  |
|                 | <i>qd359</i>      | G200C                                  |
|                 | <i>qd360</i>      | G208D                                  |
|                 | <i>qd361</i>      | G215E                                  |
|                 | <i>qd362</i>      | S225L                                  |
|                 | <i>qd363</i>      | D274N                                  |
|                 | <i>qd335</i>      | M1*                                    |
| <i>EIF-2C</i>   | <i>qd336</i>      | S443L                                  |

**Table S1: List of altered residues or splice sites caused by the suppressor mutations**

Amino acid positions and splice sites are based on the *c30h7.2a.1* isoform of *erp-44.1*. The *qd335* allele results in a new start codon just a few base pairs upstream of the original AUG, likely resulting in early translation initiation of an out-of-frame ORF that drastically truncates eIF2B $\alpha$ .

| Allele of <i>eif-2Ba</i> | Molecular identity        | Mode of inheritance | Residue conservation |
|--------------------------|---------------------------|---------------------|----------------------|
| <i>pk720</i>             | insertion/deletion        | dominant            | N/A                  |
| <i>qd333</i>             | E28K                      | dominant            | variable             |
| <i>qd334</i>             | T41I                      | dominant            | conserved            |
| <i>qd356</i>             | A70V                      | dominant            | variable             |
| <i>qd357</i>             | R98C                      | recessive           | variable             |
| <i>qd358</i>             | H132Y                     | dominant            | conserved            |
| <i>qd359</i>             | G200C                     | dominant            | conserved*           |
| <i>qd360</i>             | G208D                     | dominant            | conserved*           |
| <i>qd361</i>             | G215E                     | dominant            | conserved*           |
| <i>qd362</i>             | S225L                     | recessive           | variable             |
| <i>qd363</i>             | D274N                     | dominant            | conserved*           |
| <i>qd335</i>             | out-of-frame upstream ATG | recessive           | N/A                  |

**Table S2: Molecular alterations and modes of inheritance associated with different alleles of *eif-2Ba* that suppress the *daf-28(sa191)* constitutive dauer entry phenotype** We determined the phenotypic mode of inheritance by crossing the isolated suppressor strain (*daf-28(sa191);sup/sup*) to the starting strain (*daf-28(sa191);+/+*). If the F1 progeny (*daf-28(sa191);sup/+*) does not form dauers constitutively (i.e. one copy of *sup* is able to suppress the dauer entry phenotype), the allele is considered to behave dominantly. If the F1 progeny forms dauers constitutively, the allele confers a recessive suppression phenotype.

Residue conservation was based on yeast, worm, fly rat, mouse and human eIF2B $\alpha$  amino acid sequences, using BLOSUM as previously analyzed in Williams et al., 2001 and other eIF2B studies. The asterisk denotes residue conservation with respect to both eIF2B $\alpha$  orthologs and other regulatory subunits, eIF2B, eIF2B $\beta$  and eIF2B $\delta$ .

We also note that the isolated *eif-2Ba(qd334)* allele affecting the highly conserved residue, threonine 41, behaved similarly to the well-characterized T41A alteration in the *Saccharomyces cerevisiae* eIF2B $\alpha$  ortholog GCN3, which contributes to resistance to eIF2 $\alpha$  phosphorylation in response to nutrient deprivation in yeast (Hannig and Hinnebusch, 1988 and Pavitt et al., 1997). Moreover, the T41A alteration in human eIF2B $\alpha$  enhanced susceptibility to viral infection due to the inability to inhibit translation in response to viral RNA-induced eIF2 $\alpha$  phosphorylation (Elsby et al., 2011). The observed insensitivities to phosphorylated eIF2 $\alpha$  in multiple species may suggest a critical role of the T41 residue, as well as of the alpha subunit, in translation initiation regulation mediated by eIF2 $\alpha$  phosphorylation. Similar to the T41I substitution resulting from the *eif-2Ba(qd334)* allele, the majority of the recovered alleles alter the conserved residues of eIF2B $\alpha$ , suggesting critical contributions of these residues to recognizing phosphorylated eIF2 $\alpha$  to exert translational control (Table S2 and Kuhle et al., 2015). Our identification of diverse residues essential for eIF2( $\alpha$ P)-sensitivity may provide resources for further structure-function studies of eIF2B regulation in *C.*

*elegans*, and potentially higher metazoans, as in the case of the T41A eIF2( $\alpha$ P)-resistant mutant in yeast and human (Hannig and Hinnebusch, 1988, Pavitt et al., 1997, Elsby et al., 2011).

## References

Elsby, R., J. F. Heiber, P. Reid, S. R. Kimball, G. D. Pavitt *et al.*, 2011 The alpha subunit of eukaryotic initiation factor 2B (eIF2B) is required for eIF2-mediated translational suppression of vesicular stomatitis virus. *J Virol* 85: 9716-9725.

Hannig, E. M., and A. G. Hinnebusch, 1988 Molecular analysis of GCN3, a translational activator of GCN4: evidence for posttranslational control of GCN3 regulatory function. *Mol Cell Biol* 8: 4808-4820.

Kuhle, B., N. K. Eulig and R. Ficner, 2015 Architecture of the eIF2B regulatory subcomplex and its implications for the regulation of guanine nucleotide exchange on eIF2. *Nucleic Acids Res* 43: 9994-10014.

Pavitt, G. D., W. Yang and A. G. Hinnebusch, 1997 Homologous segments in three subunits of the guanine nucleotide exchange factor eIF2B mediate translational regulation by phosphorylation of eIF2. *Mol Cell Biol* 17: 1298-1313.

Williams, D. D., G. D. Pavitt and C. G. Proud, 2001 Characterization of the initiation factor eIF2B and its regulation in *Drosophila melanogaster*. *J Biol Chem* 276: 3733-3742.



| <b>Strain name</b> | <b>Genotype</b>                      |
|--------------------|--------------------------------------|
| N2                 | wild-type                            |
| JT191              | <i>daf-28(sa191)</i>                 |
| VS20               | <i>hjls67[atgl-1p::atgl-1::GFP]</i>  |
| ZD1094             | <i>daf-28(sa191);pek-1(qd351)</i>    |
| ZD1124             | <i>daf-28(sa191);pek-1(qd350)</i>    |
| ZD1125             | <i>daf-28(sa191qd331)</i>            |
| ZD1126             | <i>eif-2Ba(qd333);daf-28(sa191)</i>  |
| ZD1167             | <i>eif-2Ba(qd358);daf-28(sa191)</i>  |
| ZD1193             | <i>eif-2Ba(qd356);daf-28(sa191)</i>  |
| ZD1197             | <i>eif-2Ba(qd359);daf-28(sa191)</i>  |
| ZD1198             | <i>eif-2Ba(qd361);daf-28(sa191)</i>  |
| ZD1207             | <i>eif-2Ba(qd334);daf-28(sa191)</i>  |
| ZD1208             | <i>daf-28(sa191);pek-1(qd341)</i>    |
| ZD1213             | <i>daf-28(sa191);pek-1(qd342)</i>    |
| ZD1214             | <i>daf-28(sa191);pek-1(qd343)</i>    |
| ZD1215             | <i>daf-28(sa191);pek-1(qd348)</i>    |
| ZD1217             | <i>eif-2Ba(qd333)</i>                |
| ZD1219             | <i>daf-28(sa191);pek-1(qd345)</i>    |
| ZD1220             | <i>daf-28(sa191);pek-1(qd344)</i>    |
| ZD1223             | <i>daf-28(sa191);pek-1(qd339)</i>    |
| ZD1236             | <i>eif-2Ba(qd363);daf-28(sa191)</i>  |
| ZD1264             | <i>daf-28(sa191);pek-1(qd353)</i>    |
| ZD1265             | <i>daf-28(sa191);pek-1(qd347)</i>    |
| ZD1275             | <i>eif-2Ba(qd357);daf-28(sa191)</i>  |
| ZD1276             | <i>eif-2Ba(qd362);daf-28(sa191)</i>  |
| ZD1277             | <i>daf-28(sa191qd330)</i>            |
| ZD1280             | <i>eif-2Ba(qd360);daf-28(sa191)</i>  |
| ZD1281             | <i>daf-28(sa191);pek-1(qd346)</i>    |
| ZD1346             | <i>eif-2Ba(qd335);daf-28(sa191)</i>  |
| ZD1347             | <i>eif-2Ba(pk720);daf-28(sa191)</i>  |
| ZD1355             | <i>daf-28(sa191);pek-1(qd340)</i>    |
| ZD1356             | <i>erp-44.1(qd332);daf-28(sa191)</i> |
| ZD1357             | <i>daf-28(sa191);pek-1(qd349)</i>    |
| ZD1362             | <i>daf-28(sa191);pek-1(qd354)</i>    |
| ZD1365             | <i>daf-28(sa191);pek-1(qd337)</i>    |
| ZD1373             | <i>daf-28(sa191);pek-1(qd352)</i>    |
| ZD1374             | <i>erp-44.1(qd317);daf-28(sa191)</i> |
| ZD1377             | <i>erp-44.1(qd329);daf-28(sa191)</i> |

|        |                                                              |
|--------|--------------------------------------------------------------|
| ZD1392 | <i>daf-28(sa191);pek-1(qd355)</i>                            |
| ZD1451 | <i>erp-44.1(qd317);daf-28(sa191);zcls4[hsp-4p::GFP]</i>      |
| ZD1503 | <i>erp-44.1(gk411949);daf-28(sa191)</i>                      |
| ZD1565 | <i>EIF-2A(qd338);daf-28(sa191)</i>                           |
| ZD1684 | <i>qDLS10[gpa-4p::eIF2.1(S49D)]</i>                          |
| ZD1752 | <i>daf-2(e1368);qDLS10</i>                                   |
| ZD1788 | <i>EIF-2C(qd336)</i>                                         |
| ZD1789 | <i>HJLS67;qDLS10</i>                                         |
| ZD1866 | <i>EIF-2A(qd338)</i>                                         |
| ZD1869 | <i>EIF-2Ba(qd333);qDLS10</i>                                 |
| ZD1870 | <i>EIF-2C(qd336);qDLS10</i>                                  |
| ZD1871 | <i>qDEX51[gpa-4p::eIF2.1(S49A)]</i>                          |
| ZD1885 | <i>daf-7(e1372);qDLS10</i>                                   |
| ZD1886 | <i>EIF-2Ba(qd335);qDLS10</i>                                 |
| ZD1991 | <i>EIF-2Ba(qd335);daf-28(sa191);qDEX146[STR-3p::EIF-2Ba]</i> |
| ZD1992 | <i>EIF-2Ba(qd335);daf-28(sa191);qDEX147[STR-3p::EIF-2Ba]</i> |
| ZD1993 | <i>EIF-2Ba(qd335);daf-28(sa191);qDEX148[STR-3p::EIF-2Ba]</i> |
| ZD2005 | <i>EIF-2Ba(qd335)</i>                                        |
| ZD738  | <i>MGLS40[daf-28p::GFP];qDEX47[daf-7p::csp-1b] line #4</i>   |
| ZD851  | <i>EAT-2(ad1116)</i>                                         |
| ZD965  | <i>qDEX145[gpa-4p::EIF-2A(S49D)]</i>                         |
| ZD1871 | <i>qDEX51[gpa-4p::EIF-2A(S49A)]</i>                          |

**Table S3: Strains used in the study**
